# Supplementary material for: Prognostic assessment in patients operated for brain metastasis from systemic tumors
Source: PubMed Central journal article supplement (PMC10278502; doi:10.1002/cam4.5928), 2023-04-11

Figure S1

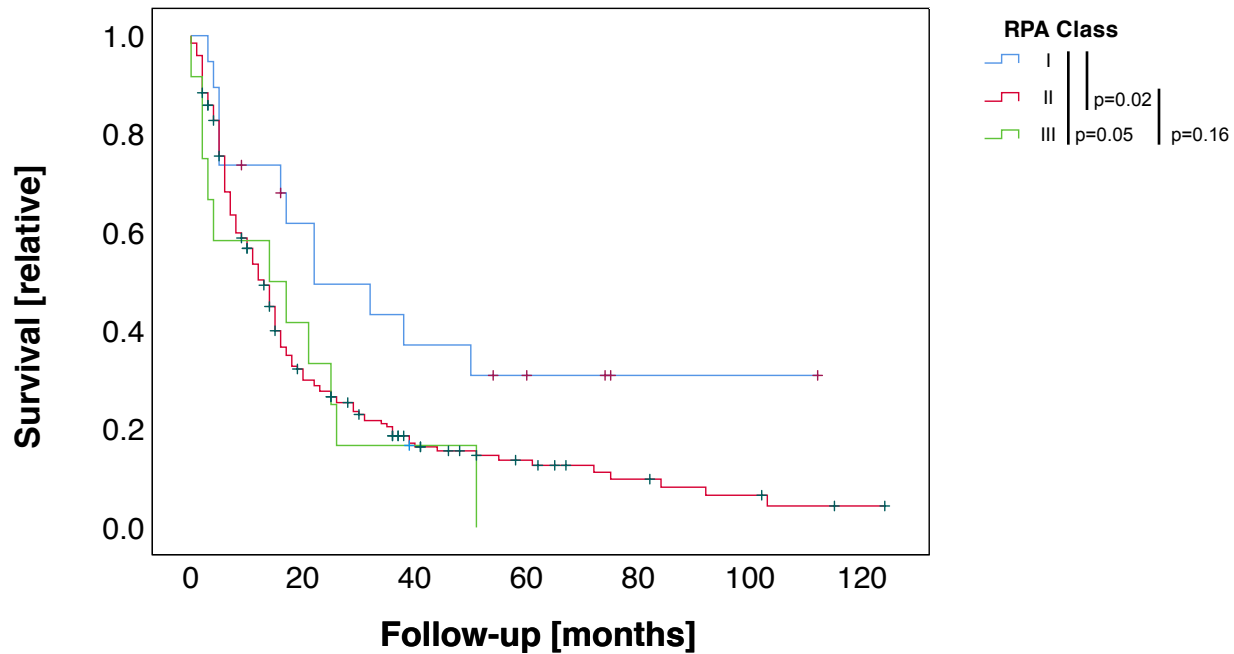

Supplement: CAM4-12-12316-s002.pdf [file CAM4-12-12316-s002.pdf]
